# Supplementary material for: Effects of polyphenolic maqui (Aristotelia chilensis) extract on the inhibition of NLRP3 inflammasome and activation of mast cells in a mouse model of Crohn’s disease-like colitis
Source: PubMed Central journal article supplement (PMC10811055; doi:10.3389/fimmu.2023.1229767), 2024-01-12
Supplement: DataSheet_2.pdf [file DataSheet_2.pdf]

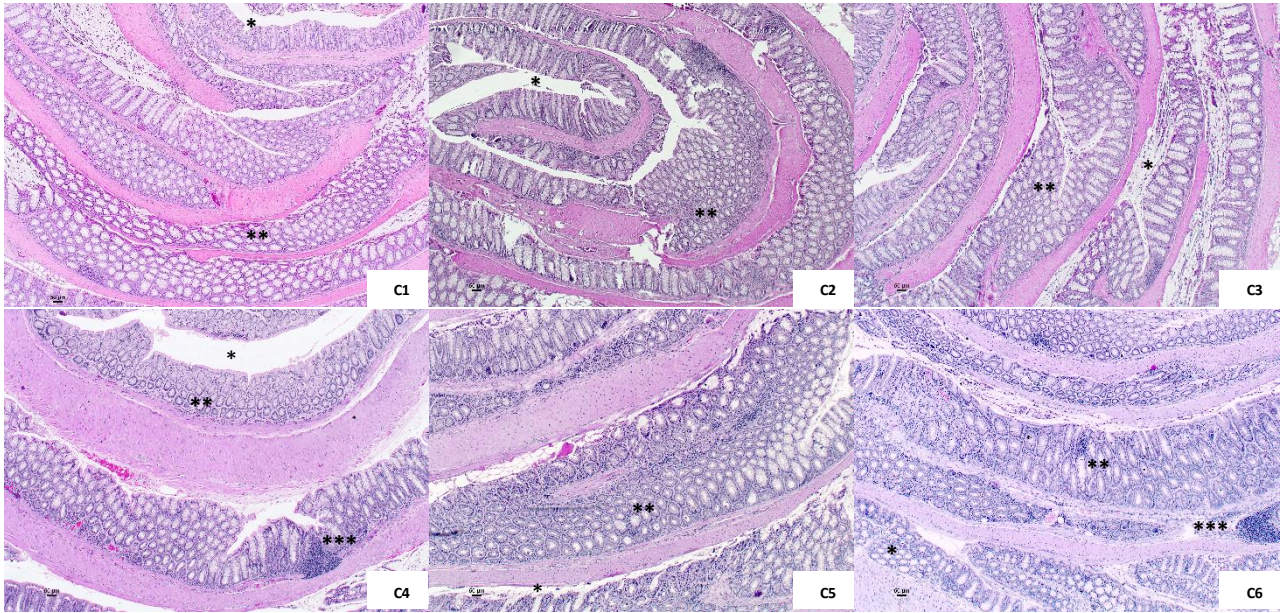

**Control (C) group**

Normal histoarchitecture in colon's tissue from Control group (C) of each mouse. \*Conserved mucosa, \*\* Normal crypts and, \*\*\*Physiological immune cell infiltration (lymph nodule). All images were captured at 40X

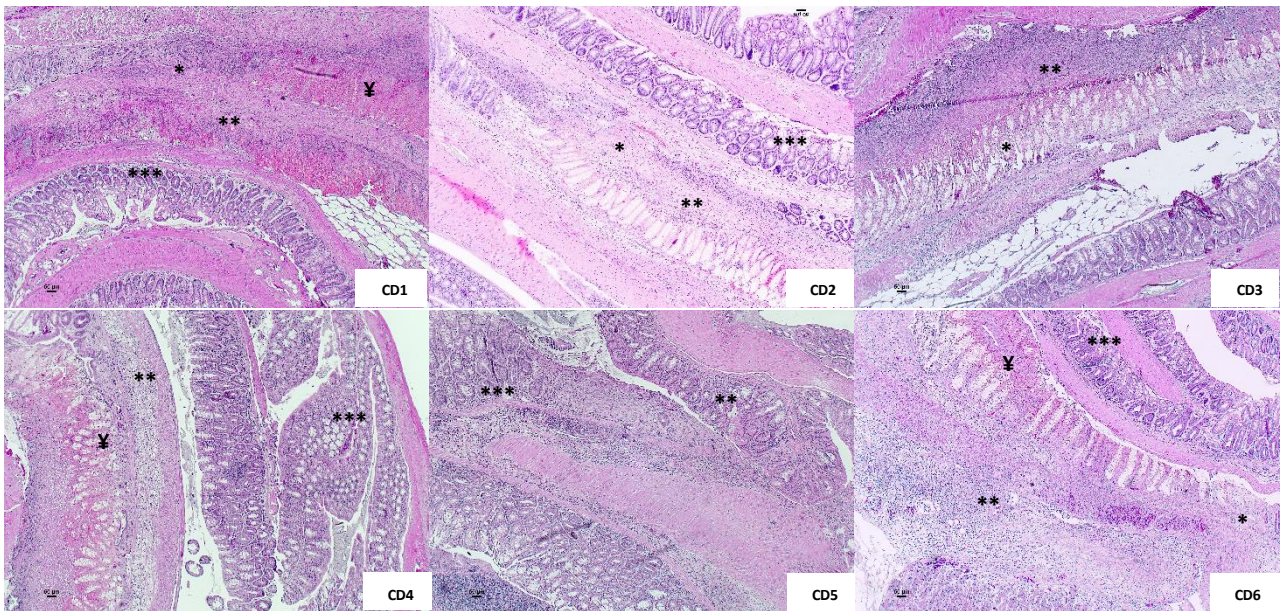

**Crohn Disease (CD) group**

Colon images from CD group (CD) of each mouse. \*Distortion of colon architecture, \*\* Inflammatory cell infiltration, \*\*\* Loss of goblet cells and, ¥ Necrosis. All images were captured at 40X



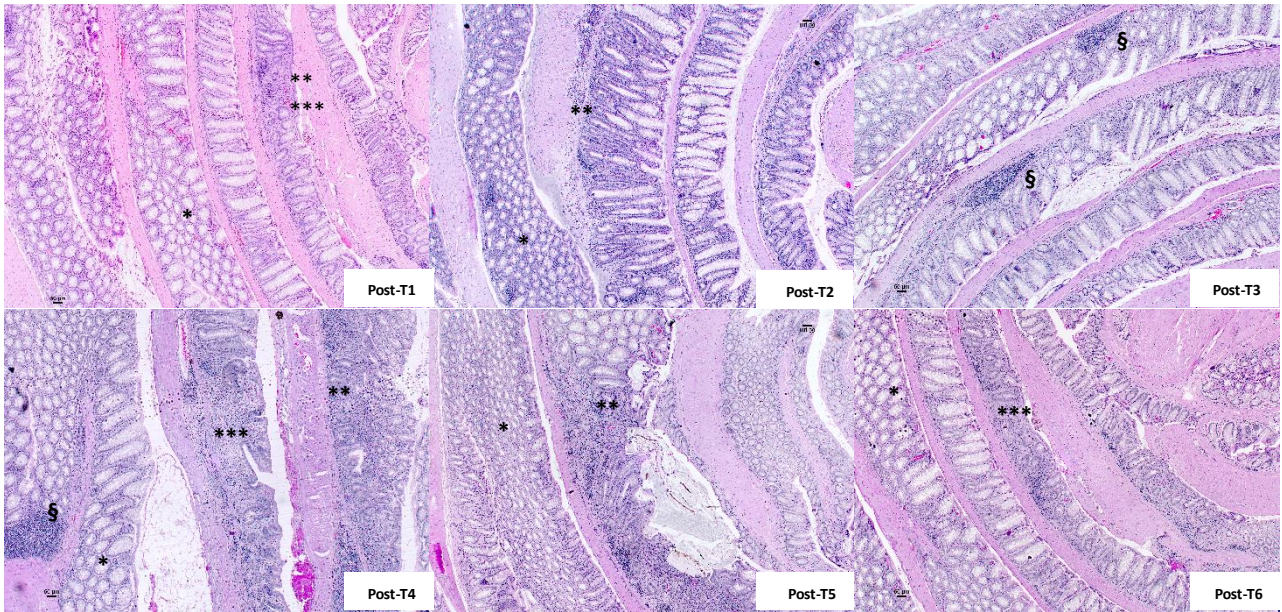

**post-Treatment (post-T) group**

Colon images from post-Treatment group (pre-T) of each mouse. \* Normal histoarchitecture, \*\* Immune cell infiltration, \*\*\*Loss of crypts and, § Physiological immune cell infiltration (lymph nodule). All images were captured at 40X

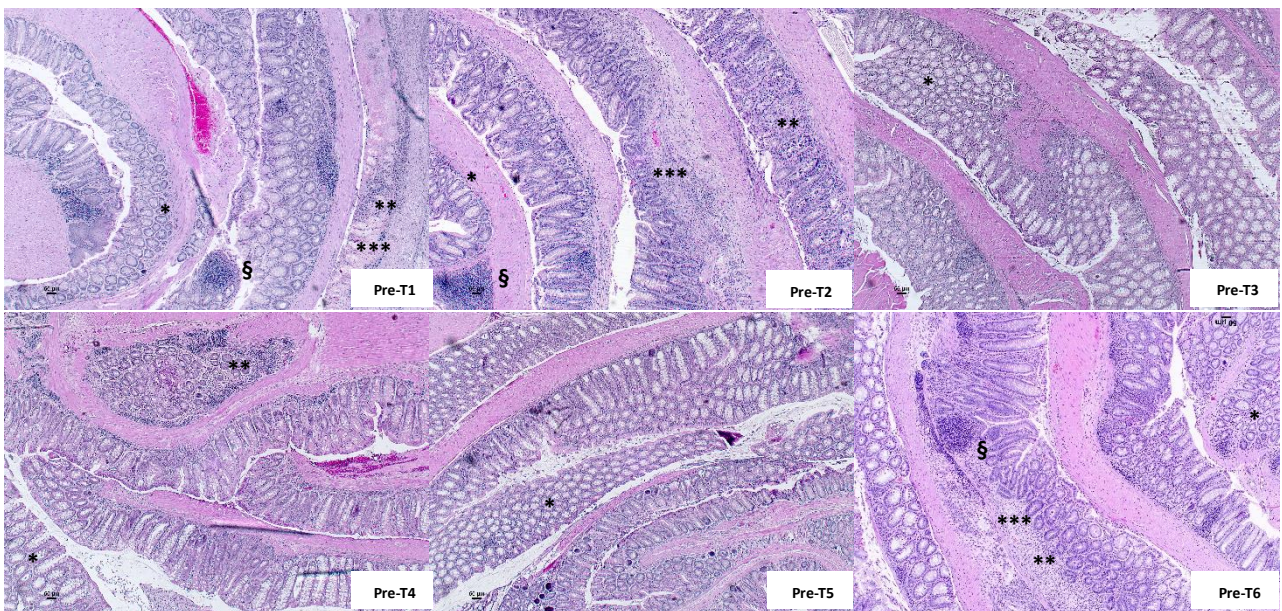

**pre-Treatment (pre-T) group**

Colon images from pre-Treatment group (pre-T) of each mouse. \* Normal histoarchitecture, \*\* Immune cell infiltration, \*\*\*Loss of crypts and, § Physiological immune cell infiltration (lymph nodule). All images were captured at 40X.
